# Supplementary material
Source: publisher site journal article supplement (https://www.spandidos-publications.com/8173/downloadSupplementary)

Figure S1. Clinical and genetic characteristics across insulin tertiles in the spinocerebellar ataxia type 3 cohort. Participants were stratified into tertiles based on plasma insulin concentrations: First tertile (n=11; <3.65  $\mu$ IU/ml), second tertile (n=11; 3.65-9.35  $\mu$ IU/ml), and third tertile (n=10; >9.35  $\mu$ IU/ml). (A) SARA scores, (B) age at onset, and (C) CAG repeat number. SARA, Scale for the Assessment and Rating of Ataxia.

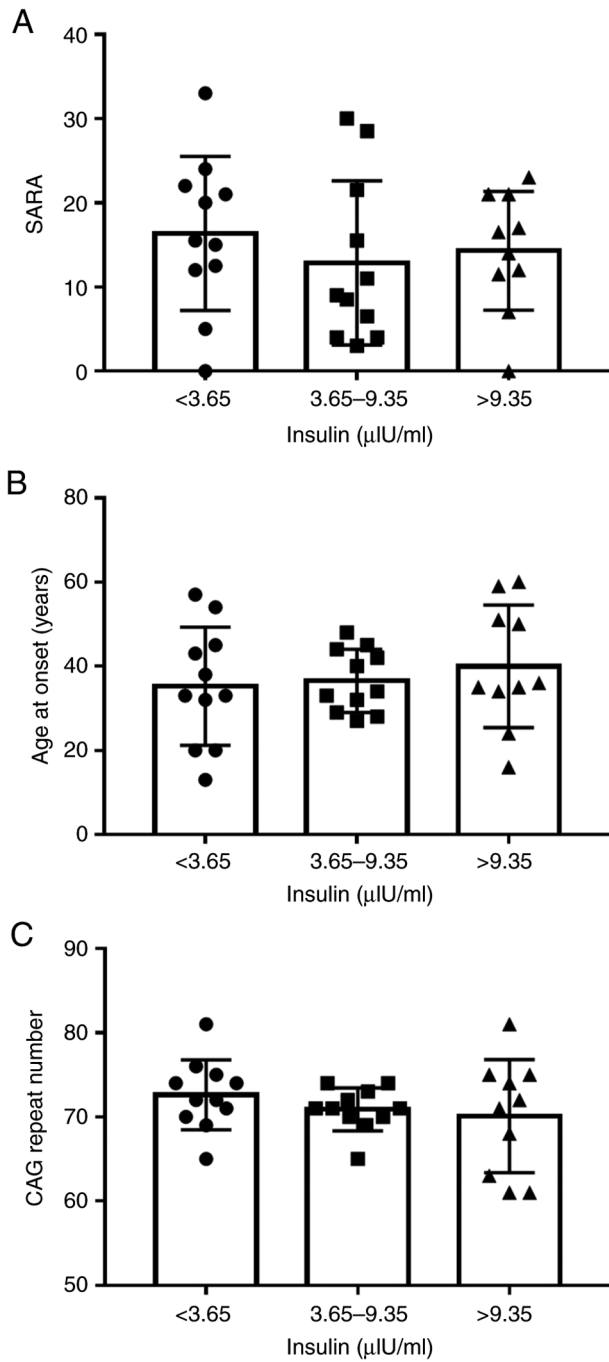

Supplement: Supplementary file 1 [file downloadSupplementary]
